# Supplementary material
Source: publisher figshare collection journal article supplement (https://diabetesjournals.figshare.com/articles/dataset/_/25111319)
Supplement: Supplementary file 1 [file 1]

|                                     | Run-in<br>(N=22) | Stage 1<br>(N=22) | Stage 2<br>(N=22) | Stage 3<br>(N=21) | Stage 3 vs Run in            |        | Stage 3 vs Stage 1           |        | Stage 3 vs Stage 2           |       |
|-------------------------------------|------------------|-------------------|-------------------|-------------------|------------------------------|--------|------------------------------|--------|------------------------------|-------|
|                                     |                  |                   |                   |                   | Mean fold<br>change (95% CI) | p      | Mean fold<br>change (95% CI) | p      | Mean fold<br>change (95% CI) | p     |
| Insulin line-set change             |                  |                   |                   |                   |                              |        |                              |        |                              |       |
| Total time (minutes)                | 110 (88, 143)    | 103 (77, 138)     | 116 (78, 145)     | 89 (73, 103)      | 0.80 (0.68, 0.93)            | 0.003  | 0.90 (0.77, 1.04)            | 0.160  | 0.84 (0.72, 0.97)            | 0.022 |
| Number of changes                   | 24 (20, 25)      | 23 (18, 25)       | 24 (20, 27)       | 21 (13, 25)       | 0.88 (0.76, 1.01)            | 0.059  | 1.00 (0.87, 1.15)            | 0.979  | 0.91 (0.79, 1.04)            | 0.160 |
| Median time per change<br>(minutes) | 5.0 (4.2, 5.3)   | 5.0 (4.0, 5.4)    | 4.8 (3.7, 5.3)    | 4.1 (3.3, 4.5)    | 0.82 (0.74, 0.91)            | <0.001 | 0.82 (0.74, 0.91)            | <0.001 | 0.86 (0.78, 0.95)            | 0.004 |
| Sensor change                       |                  |                   |                   |                   |                              |        |                              |        |                              |       |
| Total time (minutes)                | 71 (21, 96)      | 46 (25, 65)       | 46 (25, 72)       | 32 (18, 45)       | 0.51 (0.36, 0.73)            | <0.001 | 0.68 (0.48, 0.96)            | 0.029  | 0.61 (0.43, 0.87)            | 0.006 |
| Number of changes                   | 11.0 (9.0, 12.0) | 10 (8, 11)        | 12 (10, 12)       | 12 (10, 13)       | 1.09 (0.89, 1.35)            | 0.402  | 1.14 (0.92, 1.41)            | 0.222  | 0.94 (0.76, 1.16)            | 0.585 |
| Median time per change<br>(minutes) | 4.8 (3.3, 7.2)   | 4.2 (2.8, 4.6)    | 3.1 (2.4, 4.3)    | 3.0 (2.0, 3.6)    | 0.47 (0.36, 0.61)            | <0.001 | 0.56 (0.43, 0.73)            | <0.001 | 0.68 (0.52, 0.89)            | 0.004 |
| Pump upload                         |                  |                   |                   |                   |                              |        |                              |        |                              |       |
| Total time (minutes)                | 40 (3, 69)       | 4 (0, 16)         | 0 (0, 0)          | 0 (0, 0)          | 0.08 (0.04, 0.18)            | <0.001 | 0.35 (0.17, 0.74)            | 0.006  | 1.02 (0.48, 2.14)            | 0.968 |
| Number of uploads                   | 5 (1, 11)        | 1 (0, 2)          | 0 (0, 0)          | 0 (0, 0)          | 0.28 (0.19, 0.41)            | <0.001 | 0.62 (0.42, 0.92)            | 0.017  | 0.95 (0.64, 1.41)            | 0.788 |
| Median time per upload<br>(minutes) | 7.5 (5.8, 9.9)   | 6.2 (4.9, 9.5)    | 8.2 (3.4, 11.6)   | 10.1 (1.5, 28.3)  | 0.93 (0.28, 3.08)            | 0.902  | 1.02 (0.30, 3.48)            | 0.971  | 2.65 (0.63, 11.10)           | 0.183 |

**Supplementary Table 4:**

Descriptives for each stage are presented using median (IQR). Comparison between stages was performed using mixed effects linear regression with outcome transformed using natural logarithm. The changes are expressed as mean fold change with 95% confidence intervals (CI).
