# Supplementary material
Source: publisher figshare collection journal article supplement (https://diabetesjournals.figshare.com/articles/dataset/_/25111319)
Supplement: Supplementary file 2 [file 1]

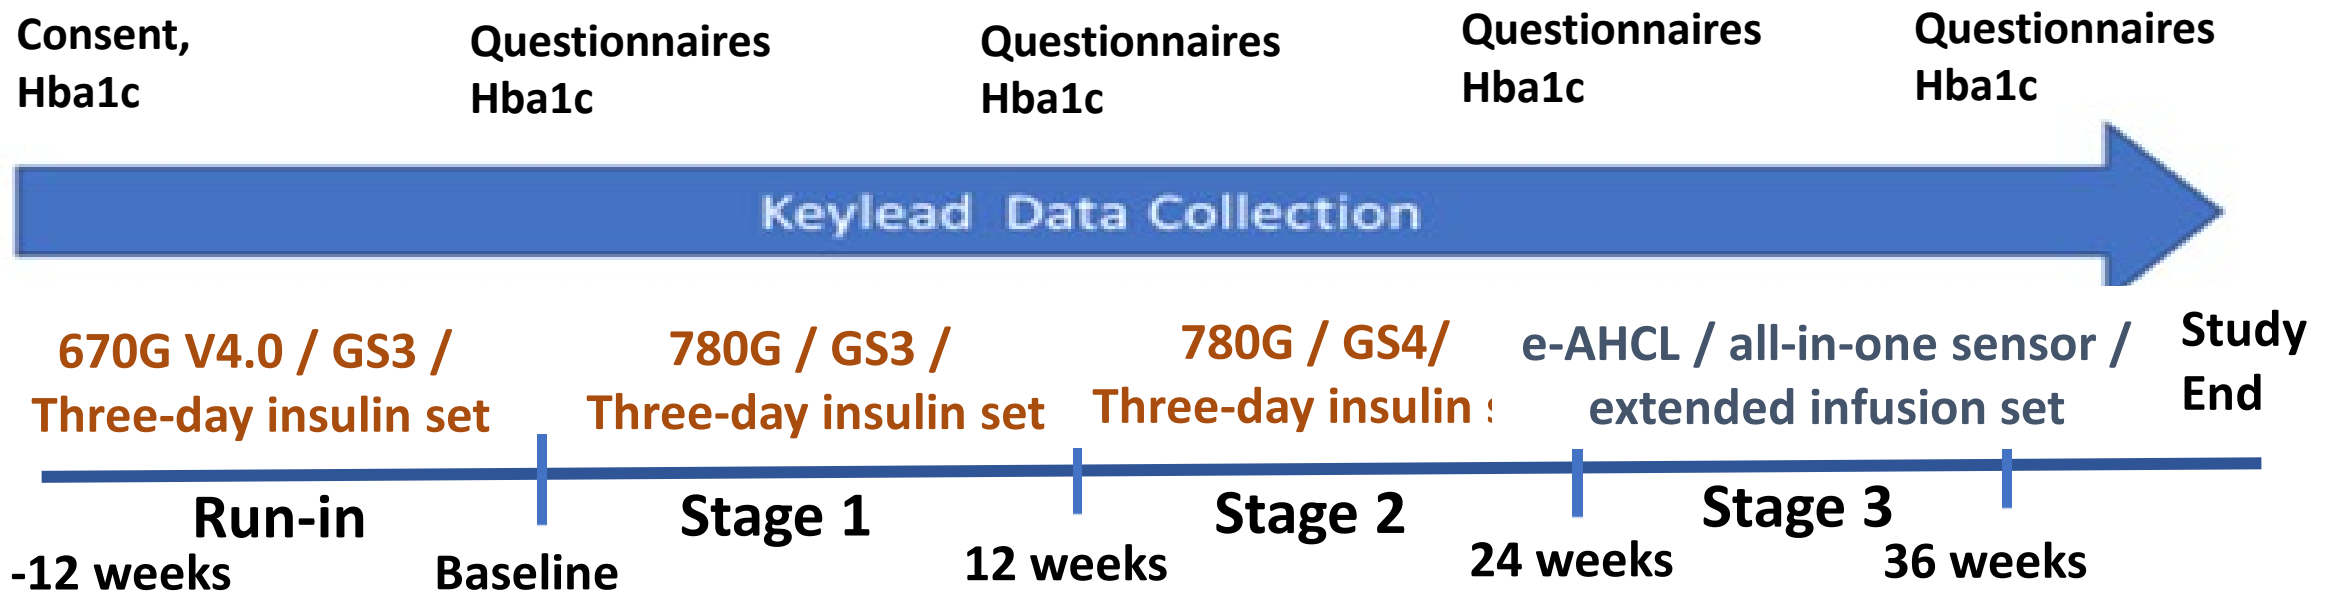

Supplementary Figure 1: Study design overview. 670G V4.0 = Minimed 780G requiring manual upload of data. 780G= Bluetooth enabled Minimed 780G automating upload of data. GS3 = Guardian Sensor 3. GS4 = Guardian Sensor 4.
