# Supplementary material
Source: publisher figshare collection journal article supplement (https://diabetesjournals.figshare.com/articles/dataset/_/25111319)
Supplement: Supplementary file 3 [file 1]

| Characteristic                                       | 670G V4.0- +GS3                                  | 780G + GS3                                                                 | 780G +GS4                                                                  | e-AHCL-+ all-in one sensor                                                 |
|------------------------------------------------------|--------------------------------------------------|----------------------------------------------------------------------------|----------------------------------------------------------------------------|----------------------------------------------------------------------------|
| Menu                                                 | List based                                       | Icon based                                                                 | Icon based                                                                 | Icon based                                                                 |
| Time in Range graphs                                 | Separate Day and Night                           | Single 24 hour rolling                                                     | Single 24 hour rolling                                                     | Single 24 hour rolling                                                     |
| Wireless Connectivity                                | Radiofrequency, Tel-D                            | Bluetooth                                                                  | Bluetooth                                                                  | Bluetooth                                                                  |
| Phone App Connectivity                               | No                                               | Yes                                                                        | Yes                                                                        | Yes                                                                        |
| Control Algorithm                                    | AHCL                                             | AHCL                                                                       | AHCL                                                                       | e-AHCL                                                                     |
| Target Setpoints                                     | 5.6 mmol/L (100 mg/dL)<br>6.7 mmol/L (120 mg/dL) | 5.6 mmol/L (100 mg/dL)<br>6.1 mmol/L (110 mg/dL)<br>6.7 mmol/L (120 mg/dL) | 5.6 mmol/L (100 mg/dL)<br>6.1 mmol/L (110 mg/dL)<br>6.7 mmol/L (120 mg/dL) | 5.6 mmol/L (100 mg/dL)<br>6.1 mmol/L (110 mg/dL)<br>6.7 mmol/L (120 mg/dL) |
| Temp Target (8.3 mmol/L [150mg/dL]) Maximum Duration | 12 hours                                         | 24 hours                                                                   | 24 hours                                                                   | 24 hours                                                                   |
| Mandatory Critical Low Alert                         | 2.8 mmol/L (50 mg/dL)                            | 3.0 mmol/L (54 mg/dL)                                                      | 3.0 mmol/L (54 mg/dL)                                                      | 3.0 mmol/L (54 mg/dL)                                                      |
| Sensor glucose range                                 | 2.2-22.2 mmol/L<br>(40 – 400 mg/dL)              | 2.8-22.2 mmol/L<br>(50 – 400 mg/dL)                                        | 2.8-22.2 mmol/L<br>(50 – 400 mg/dL)                                        | 2.8-22.2 mmol/L<br>(50 – 400 mg/dL)                                        |
| Sensor Calibration                                   | Fingerstick                                      | Fingerstick                                                                | none                                                                       | none                                                                       |
| Infusion set                                         | 3-Day                                            | 3-Day                                                                      | 3-Day                                                                      | 7-Day                                                                      |

**Supplementary Table 1:** Summary of AID System Differences. AHCL= advanced hybrid closed loop system. e-AHCL= enhanced-advanced hybrid closed loop system with an updated AHCL algorithm which includes modifications to the calculation of the autocorrection boluses and daily user adaptations. GS3 = Guardian Sensor 3. GS4 = Guardian Sensor 4.
