# Supplementary material
Source: publisher figshare collection journal article supplement (https://diabetesjournals.figshare.com/articles/dataset/_/25111319)
Supplement: Supplementary file 4 [file 1]

|                                                                          | Run-in     | Stage 1    | Stage 2    | Stage 3  | Stage 3 vs Run-in  |        | Stage 3 vs Stage 1 |        | Stage 3 vs Stage 2 |       |
|--------------------------------------------------------------------------|------------|------------|------------|----------|--------------------|--------|--------------------|--------|--------------------|-------|
|                                                                          | N=22       | N=22       | N=22       | N=21     | Change<br>(95% CI) | p      | Change<br>(95% CI) | p      | Change<br>(95% CI) | p     |
| Worry or fear about high blood sugar                                     | 3 (2, 3)   | 4 (3, 4)   | 3 (3, 4)   | 4 (3, 4) | 1 (0, 2)           | <0.001 | 0 (0, 1)           | 0.257  | 0 (0, 1)           | 0.063 |
| Effort to keep low blood sugar from happening                            | 3.5 (2, 4) | 4 (3, 4)   | 4 (4, 4)   | 4 (4, 4) | 1 (0, 1)           | 0.004  | 0 (0, 1)           | 0.207  | 0 (-1, 1)          | >0.99 |
| Worry or fear about low blood sugar during sleep                         | 4 (3, 5)   | 4 (4, 5)   | 5 (4, 5)   | 5 (4, 5) | 1 (0, 1)           | 0.005  | 0 (0, 1)           | 0.033  | 0 (0, 0)           | >0.99 |
| Feeling different from others                                            | 4 (3, 5)   | 4 (3, 5)   | 5 (4, 5)   | 5 (4, 5) | 0 (0, 1)           | 0.008  | 0 (0, 1)           | 0.047  | 0 (0, 0)           | >0.99 |
| Amount of time spent thinking about diabetes                             | 3 (2, 4)   | 3 (2, 4)   | 3.5 (3, 4) | 4 (3, 4) | 1 (0, 1)           | 0.001  | 0 (0, 1)           | 0.028  | 0 (0, 1)           | 0.316 |
| Not knowing how eating affects blood sugar                               | 3.5 (3, 5) | 4 (3, 5)   | 4 (3, 5)   | 4 (3, 5) | 0 (0, 1)           | 0.242  | 0 (0, 0)           | >0.99  | 0 (0, 1)           | 0.432 |
| Amount of time and effort needed for diabetes from my family or me       | 3 (2, 4)   | 3 (3, 4)   | 4 (3, 5)   | 4 (4, 5) | 1 (0, 1)           | <0.001 | 1 (0, 1)           | 0.018  | 0 (-1, 1)          | 0.817 |
| Worry or fear about long term health                                     | 2.5 (2, 3) | 3 (3, 4)   | 3 (3, 4)   | 4 (3, 4) | 1 (1, 2)           | <0.001 | 1 (0, 1)           | <0.001 | 0 (0, 1)           | 0.056 |
| Worry or fear about daytime low blood sugar                              | 4 (3, 4)   | 4 (3, 4)   | 4 (3, 4)   | 4 (4, 4) | 1 (0, 1)           | 0.027  | 0 (0, 1)           | 0.076  | 0 (0, 1)           | 0.021 |
| Effort to keep high blood sugar from happening                           | 3 (2, 4)   | 3 (3, 4)   | 3 (3, 4)   | 4 (3, 4) | 1 (0, 2)           | <0.001 | 0 (0, 1)           | 0.063  | 0 (0, 1)           | 0.145 |
| Pain or discomfort from finger sticks or sensors                         | 4 (3, 4)   | 3 (3, 4)   | 5 (4, 5)   | 5 (4, 5) | 1 (0, 1)           | 0.001  | 1 (0, 1)           | 0.004  | 0 (0, 0)           | 0.68  |
| Pain or discomfort from insulin injects or pump sets                     | 4 (3, 4)   | 4 (3, 5)   | 4 (4, 5)   | 5 (3, 5) | 1 (0, 1)           | 0.003  | 0 (0, 1)           | 0.02   | 0 (0, 1)           | 0.514 |
| Family arguments or worries about diabetes                               | 5 (4, 5)   | 5 (5, 5)   | 5 (5, 5)   | 5 (5, 5) | 0 (0, 1)           | 0.008  | 0 (0, 0)           | 0.625  | 0 (0, 0)           | >0.99 |
| Trouble sleeping well                                                    | 4 (3, 5)   | 4 (3, 4)   | 4 (4, 5)   | 4 (3, 4) | 0 (-1, 1)          | >0.99  | 0 (0, 1)           | 0.146  | 0 (-1, 0)          | 0.168 |
| Strictness of the meal plan                                              | 4 (3, 5)   | 4 (3, 5)   | 4.5 (4, 5) | 4 (4, 5) | 0 (0, 1)           | 0.918  | 0 (0, 1)           | 0.508  | 0 (0, 0)           | 0.563 |
| Coping with work or school along with diabetes                           | 3 (3, 4)   | 4 (3, 5)   | 4 (4, 5)   | 4 (4, 5) | 1 (1, 1)           | 0.001  | 0 (0, 1)           | 0.076  | 0 (0, 0)           | >0.99 |
| Taking part in sports, exercise or playing despite diabetes              | 4 (2, 4)   | 4 (3, 4)   | 4 (3, 5)   | 4 (3, 5) | 0 (0, 1)           | 0.047  | 0 (0, 1)           | 0.109  | 0 (0, 0)           | 0.781 |
| Knowing how much insulin to take                                         | 4 (3, 5)   | 4 (3, 4)   | 4 (4, 5)   | 5 (4, 5) | 0 (0, 1)           | 0.008  | 1 (0, 1)           | 0.003  | 0 (0, 1)           | 0.316 |
| Keeping up with friends or peers who don't have diabetes                 | 4.5 (3, 5) | 4.5 (4, 5) | 5 (4, 5)   | 5 (4, 5) | 0 (0, 1)           | 0.047  | 0 (0, 0)           | 0.727  | 0 (0, 0)           | >0.99 |
| Reacting to all of the blood sugar results that I get                    | 4 (3, 4)   | 4 (3, 4)   | 4 (4, 4)   | 4 (4, 5) | 1 (0, 1)           | 0.03   | 0 (0, 1)           | 0.119  | 0 (0, 0)           | >0.99 |
| Dealing with others who ask about diabetes                               | 4 (3, 5)   | 4 (4, 5)   | 5 (4, 5)   | 4 (4, 5) | 0 (0, 1)           | 0.026  | 0 (0, 1)           | 0.125  | 0 (0, 0)           | 0.313 |
| My amount of responsibility for taking care of diabetes                  | 3 (2, 4)   | 3 (2, 4)   | 3.5 (2, 5) | 4 (3, 5) | 1 (0, 2)           | 0.008  | 1 (0, 1)           | 0.042  | 0 (0, 1)           | 0.257 |
| Being sure that pre-meal insulin covers the amount of carbohydrate eaten | 3 (2, 4)   | 3 (2, 4)   | 3 (3, 4)   | 4 (3, 4) | 0 (0, 1)           | 0.039  | 0 (0, 1)           | 0.092  | 0 (0, 1)           | 0.158 |
| Getting the right amount of insulin when meals are skipped or delayed    | 3 (2, 4)   | 4 (3, 4)   | 4 (4, 5)   | 4 (3, 5) | 1 (0, 1)           | <0.001 | 0 (0, 1)           | 0.097  | 0 (0, 1)           | 0.973 |

|                                                                      |          |            |          |          |          |        |          |       |          |       |
|----------------------------------------------------------------------|----------|------------|----------|----------|----------|--------|----------|-------|----------|-------|
| Reacting to all of the alarms from diabetes devices                  | 3 (2, 4) | 4 (2, 4)   | 4 (3, 4) | 4 (4, 4) | 1 (0, 2) | <0.001 | 0 (0, 1) | 0.031 | 0 (0, 1) | 0.716 |
| Getting the right amount of insulin on sick days                     | 4 (3, 5) | 4 (4, 5)   | 4 (4, 5) | 5 (3, 5) | 0 (0, 1) | 0.120  | 0 (0, 1) | 0.231 | 0 (0, 1) | 0.342 |
| Feeling that diabetes devices run my life                            | 3 (2, 4) | 3.5 (3, 4) | 4 (3, 5) | 4 (4, 5) | 1 (0, 1) | <0.001 | 1 (0, 1) | 0.063 | 0 (0, 0) | 0.219 |
| Getting the right amount of insulin after exercising more than usual | 3 (2, 4) | 3 (3, 4)   | 3 (3, 4) | 4 (3, 4) | 1 (0, 2) | <0.001 | 0 (0, 1) | 0.052 | 0 (0, 1) | 0.121 |
| Coping with carrying and using several devices                       | 3 (2, 4) | 4 (2, 4)   | 4 (3, 5) | 4 (3, 5) | 1 (0, 1) | 0.001  | 0 (0, 1) | 0.078 | 0 (0, 0) | 0.883 |
| Looking different because of diabetes and using devices              | 4 (3, 5) | 4 (3, 5)   | 5 (4, 5) | 5 (4, 5) | 0 (0, 1) | 0.009  | 0 (0, 1) | 0.08  | 0 (0, 0) | 0.75  |

Supplementary Table 3

Descriptives for each stage are presented using median (IQR). Wilcoxon sign rank test was used for comparison between stages, presented are median changes with 95% confidence intervals (CI).
