# Supplementary material
Source: publisher figshare collection journal article supplement (https://diabetesjournals.figshare.com/articles/dataset/_/25111319)
Supplement: Supplementary file 5 [file 1]

| Baseline Parameter                                | Measure     |
|---------------------------------------------------|-------------|
| Female / Male (n)                                 | 11 / 11     |
| Age (Years)*                                      | 49 (13)     |
| BMI (kg/m <sup>2</sup> )*                         | 29.2 (6.2)  |
| Diabetes Duration (Years)*                        | 29.3 (14.6) |
| HbA1c (%)*                                        | 6.6 (0.4)   |
| HbA1c (mmol/mol)*                                 | 50 (4)      |
| Insulin pump experience (Years)*                  | 11.6 (5.3)  |
| Continuous Glucose Monitoring Experience (Years)* | 7 (4)       |
| Aspart / FiAsp (n)                                | 2 / 20      |
| Gold score                                        | 2.8 (1.5)   |

**Supplementary Table 2:** Baseline characteristics. \*Results expressed as Mean (SD)
